# Supplementary material
Source: MDPI journal article supplement (https://www.mdpi.com/2073-4441/14/9/1515)
Supplement: s1 [file s1]

Supplementary material

# Potential Risk of Agrochemical Leaching in Areas of Edapho-climatic Suitability for Coffee Cultivation

Gleissy Mary Amaral Dino Alves dos Santos <sup>1</sup>, Antônio Augusto Neves <sup>1</sup>, Maria Eliana Lopes Ribeiro de Queiroz <sup>1</sup>, Vagner Tebaldi de Queiroz <sup>2</sup>, Carlos Antonio Alvares Soares Ribeiro <sup>1</sup>, Renata Pereira Lopes Moreira <sup>1</sup>, Efraim Lázaro Reis <sup>1</sup>, Ana Carolina Pereira Paiva <sup>1</sup>, José Romário de Carvalho <sup>1</sup>, Samuel Ferreira da Silva <sup>2</sup>, Ronie Silva Juvanhol <sup>3</sup>, Taís Rizzo Moreira <sup>2</sup>, Luciano José Quintão Teixeira <sup>2</sup>, Sérgio Henriques Saraiva <sup>2</sup>, Adilson Vidal Costa <sup>2</sup>, Camila Aparecida da Silva Martins <sup>2</sup>, Fábio Ribeiro Pires <sup>2</sup>, Thuelem Azevedo Curty <sup>2</sup>, Plínio Antonio Guerra Filho <sup>4\*</sup>, Marcelo Henrique de Souza <sup>5</sup>, Waldir Cintra de Jesus Junior <sup>6</sup> and Alexandre Rosa dos Santos <sup>2</sup>

**Table S1.** Soils physicochemical properties.

| Soil                             | Fc (v v <sup>-1</sup> ) | $\rho$ (g cm <sup>-3</sup> ) | OC (g g <sup>-1</sup> ) | $\delta$ (v v <sup>-1</sup> ) |
|----------------------------------|-------------------------|------------------------------|-------------------------|-------------------------------|
| Argisol <sup>1</sup>             | 0.2950                  | 1.5875                       | 0.0263                  | 0.5875                        |
| Cambisol <sup>2,3</sup>          | 0.4685                  | 1.4000                       | 0.0296                  | 0.4763                        |
| Chernosol <sup>4,5</sup>         | 0.1540                  | 1.4200                       | 0.0218                  | 0.4800                        |
| Spodosol <sup>6</sup>            | 0.0638                  | 1.7240                       | 0.0098                  | 0.3460                        |
| Gleysol <sup>1</sup>             | 0.3750                  | 1.0300                       | 0.0620                  | 0.5226                        |
| Latosol <sup>1</sup>             | 0.2625                  | 1.2625                       | 0.0194                  | 0.5875                        |
| Fluvic Neosol <sup>7</sup>       | 0.2027                  | 1.3700                       | 0.0088                  | 0.4450                        |
| Litholic Neosol <sup>8</sup>     | 0.2637                  | 1.6900                       | 0.0024                  | 0.3500                        |
| Quartzarenic Neosol <sup>1</sup> | 0.1838                  | 1.5000                       | 0.0036                  | 0.5188                        |
| Red Litosol <sup>1</sup>         | 0.3250                  | 1.2625                       | 0.0225                  | 0.6375                        |
| Haplic Organosol <sup>9</sup>    | 0.2080                  | 0.2660                       | 0.3738                  | 0.8900                        |

**Table S2.** Thermal Aptitude ranges for conilon (*Coffea canephora* Pierre ex Froehner) and arabica coffee (*Coffea arabica* L.).

| Aptitude   | Temperature (°C) |                       |
|------------|------------------|-----------------------|
|            | Conilon coffe    | arabica coffe         |
| Apt        | 22 to 26         | 19 to 22              |
| Restricted | 21 to 22         | 18 to 19 and 22 to 23 |
| Inapt      | < 21 and > 26    | < 18 and > 23         |

**Table S3.** Water aptitude ranges for the cultivation of conilon (*Coffea canephora* Pierre ex Froehner) and arabica coffee (*Coffea arabica* L.).

| Aptitude                                 | Water Deficit (mm) |                |
|------------------------------------------|--------------------|----------------|
|                                          | Conilon coffee     | Arabica coffee |
| Apt Without Irrigation (AWI)             | < 150              | < 100          |
| Apt With Occasional Irrigation (AWOCI)   | 150 to 200         | 100 to 150     |
| Apt With Complementary Irrigation (AWCI) | 200 to 400         | 150 to 200     |
| Apt With Obligatory Irrigation (AWOBI)   | > 400              | > 200          |

**Table S4.** Physicochemical properties of the active ingredients used in coffee crop.

| Pesticides                | soil $t_{1/2}$ (days <sup>-1</sup> ) | K <sub>OC</sub> (mL g <sup>-1</sup> ) | k (days <sup>-1</sup> ) | K <sub>H</sub> (Pa m <sup>3</sup> mol <sup>-1</sup> ) |
|---------------------------|--------------------------------------|---------------------------------------|-------------------------|-------------------------------------------------------|
| 2,4-D <sup>1</sup>        | 4.4                                  | 39.3                                  | 0.157533                | 4.0 × 10 <sup>-6</sup>                                |
| Chlorpyrifos <sup>1</sup> | 50.0                                 | 8,151.0                               | 0.013863                | 4.78 × 10 <sup>-1</sup>                               |
| Diuron <sup>1</sup>       | 75.5                                 | 813.0                                 | 0.009181                | 2.00 × 10 <sup>-6</sup>                               |
| Glyphosate <sup>1</sup>   | 15.0                                 | 1,424.0                               | 0.046210                | 2.10 × 10 <sup>-7</sup>                               |
| Paraquat <sup>1</sup>     | 3,000.0                              | 1,000,000.0                           | 0.001899                | 4.0 × 10 <sup>-9</sup>                                |

|                              |       |          |          |                        |
|------------------------------|-------|----------|----------|------------------------|
| Pendimethalin <sup>1</sup>   | 182.3 | 17,491.0 | 0.003802 | $2.73 \times 10^{-3}$  |
| Sulfentrazone <sup>1,2</sup> | 541.0 | 43.0     | 0.001281 | $1.878 \times 10^{-4}$ |
| Tebuconazole <sup>1,3</sup>  | 63.0  | 769.0    | 0.011002 | $1.00 \times 10^{-5}$  |
| Terbufos <sup>1</sup>        | 8.0   | 500.0    | 0.086643 | 2.70                   |
| Thiamethoxam <sup>1</sup>    | 50.0  | 56.2     | 0.013863 | $4.70 \times 10^{-10}$ |

**Table S5.** Adsorption Potential categories for the reduction factor (RF).

| Retardation Factor (RF) | Adsorption Potential |
|-------------------------|----------------------|
| 1.0                     | Very low             |
| 1.0 to 2.0              | Low                  |
| 2.0 to 3.0              | Medium               |
| 3.0 to 10.0             | High                 |
| > 10.0                  | Very high            |

Source: Khan and Liang<sup>1</sup> and Rao, Hornsby and Jessup<sup>2</sup>.

**Table S6.** Leaching potential categories for the attenuation factor (AF).

| Attenuation Factor (AF) | Leaching potential |
|-------------------------|--------------------|
| 0.0                     | Null               |
| 0.0 to 0.0001           | Very low           |
| 0.0001 to 0.01          | Low                |
| 0.01 to 0.1             | Medium             |
| 0.1 to 0.25             | High               |
| 0.25 to 1.0             | Very high          |

Source: Khan and Liang<sup>1</sup> and Rao, Hornsby and Jessup<sup>2</sup>.

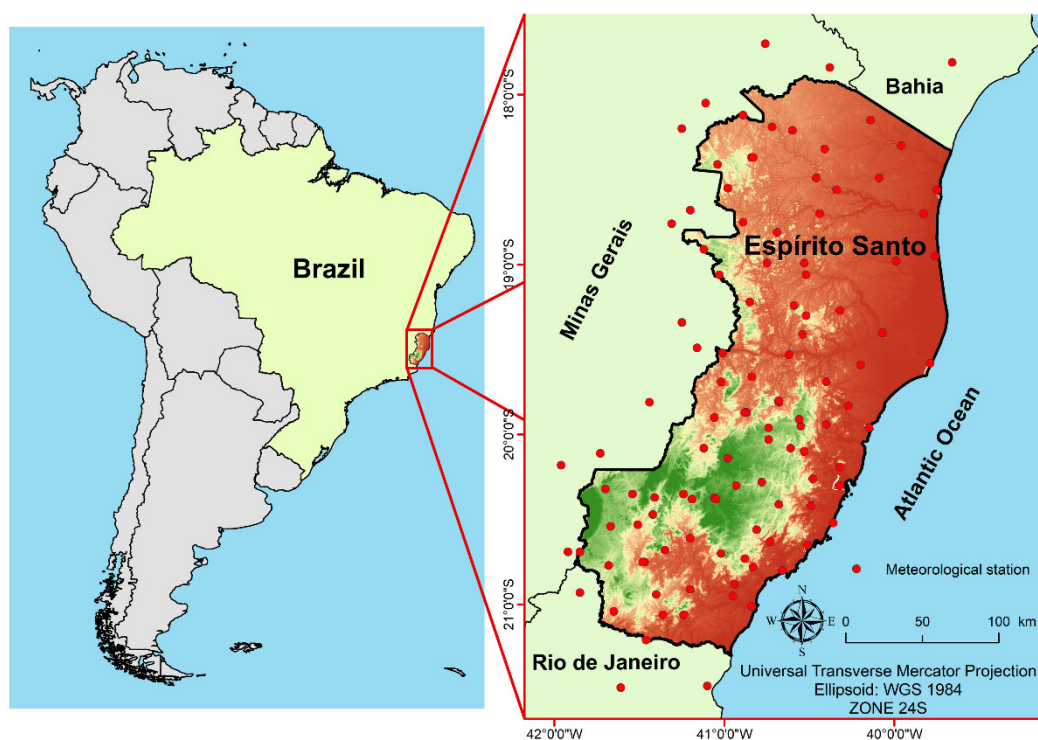

**Figure S1**

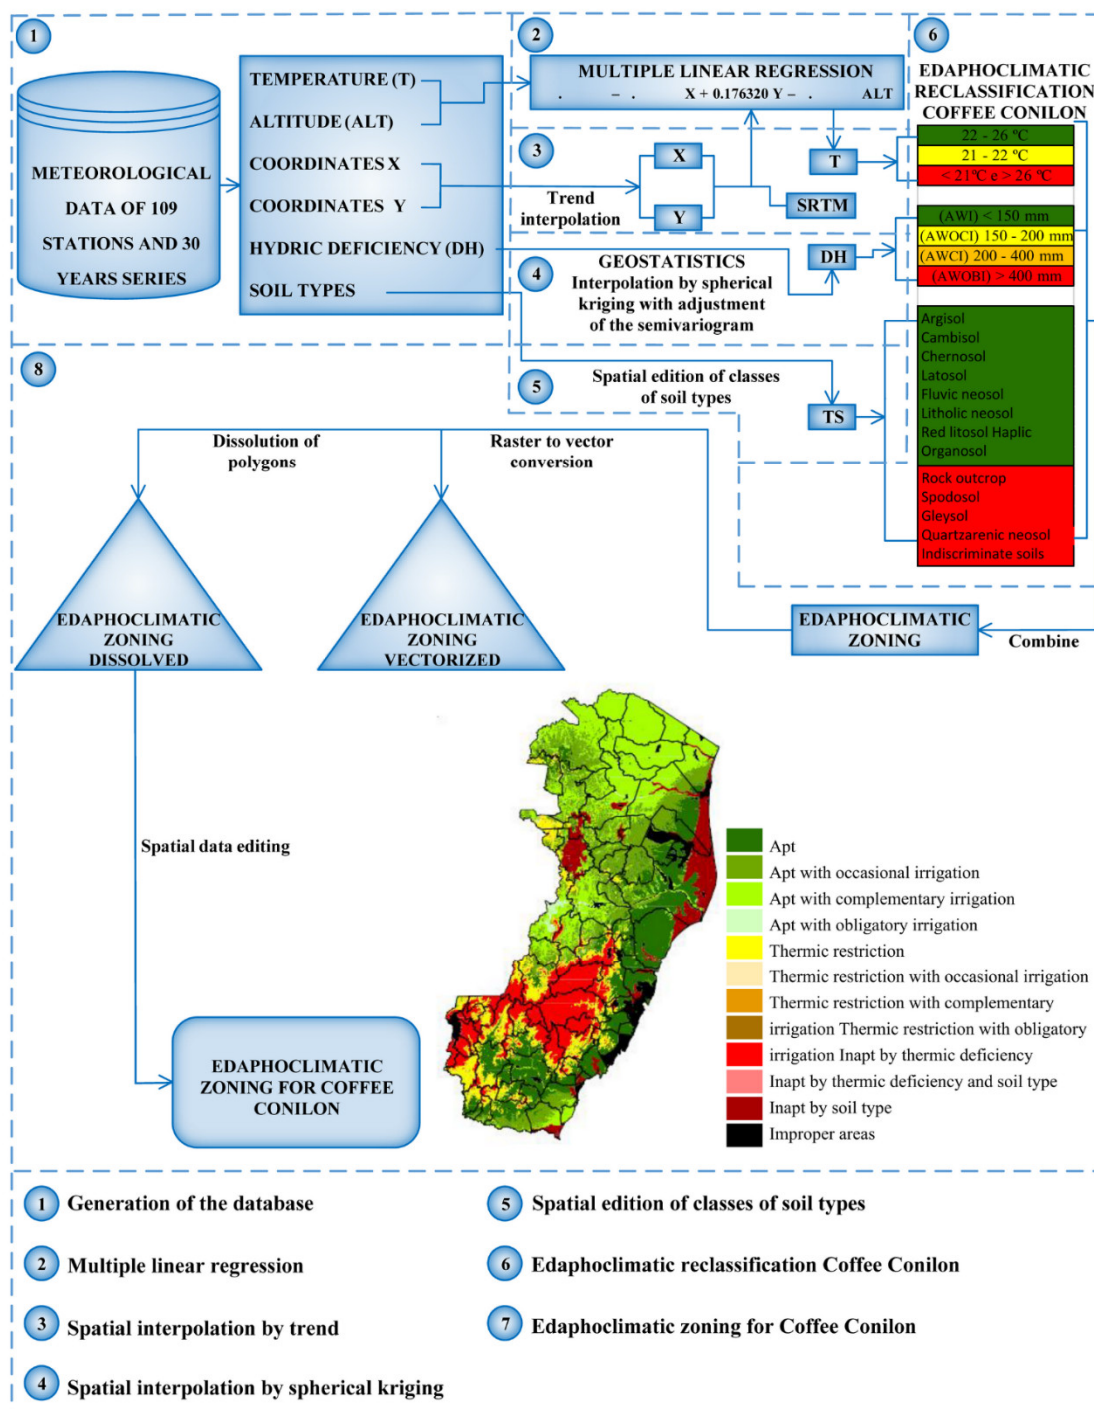

Figure S2

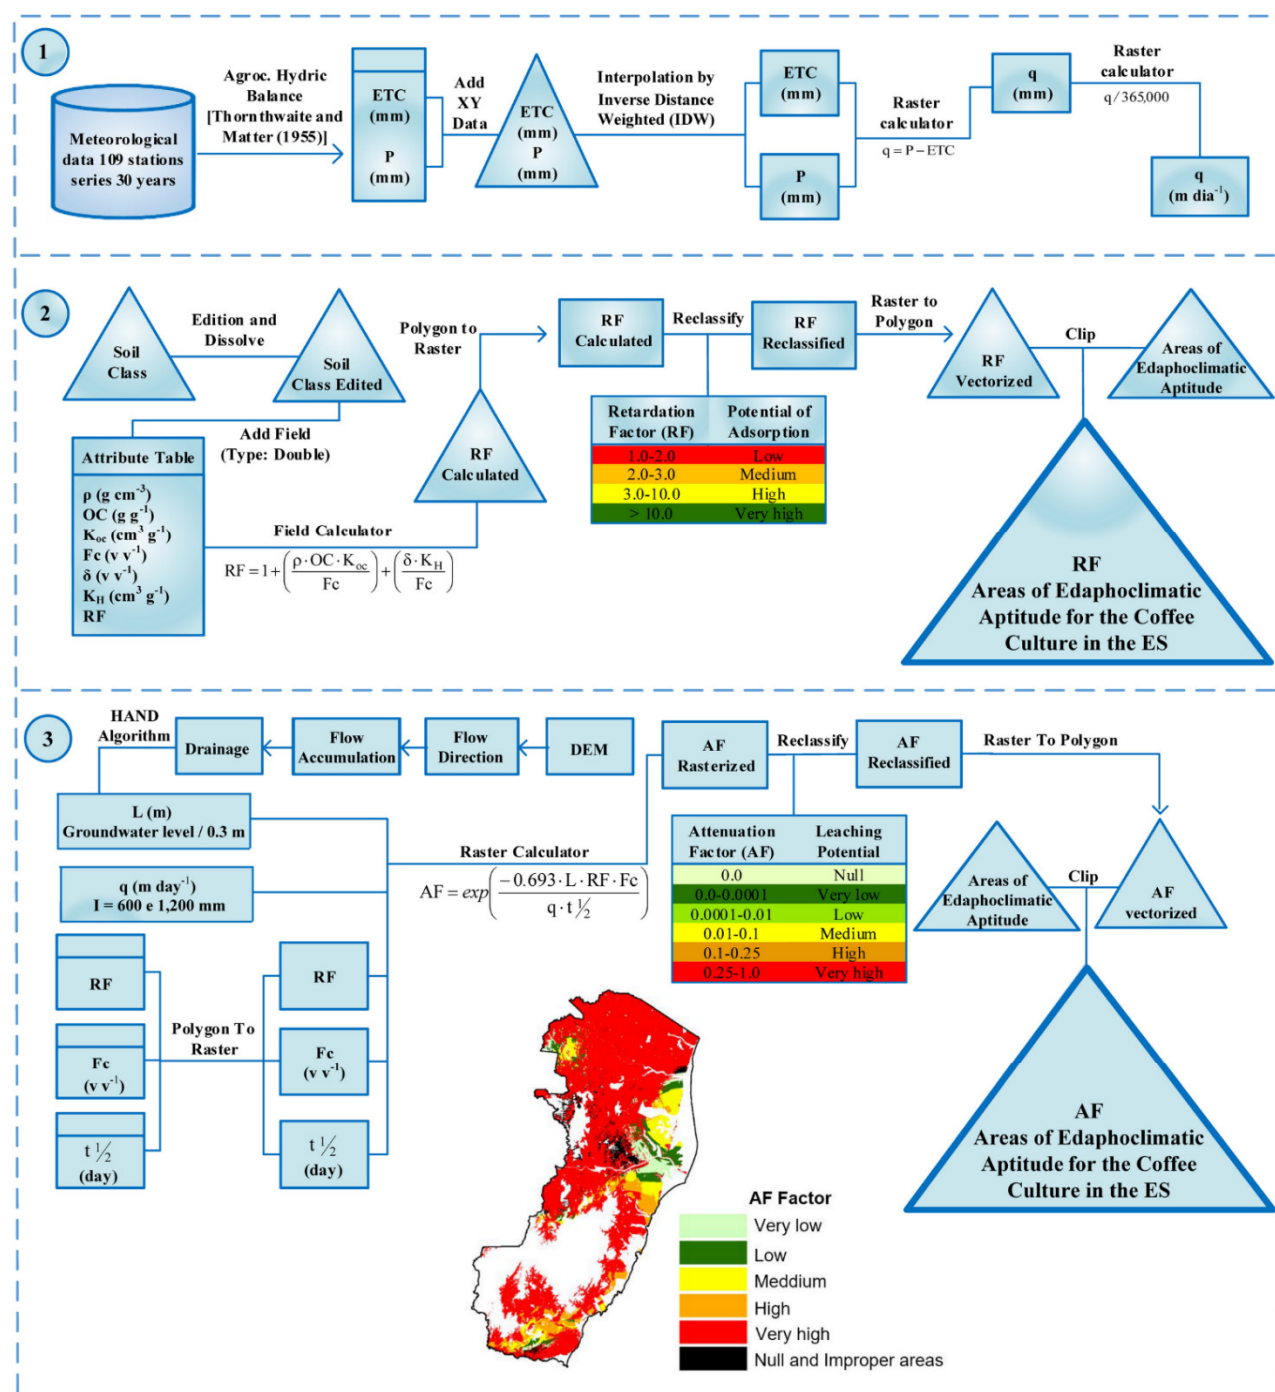

- 1 Step 1 - Spatial distribution of recharge rate of groundwater.
- 2 Step 2 - Spatial distribution of the retardation factor in pesticide movement in soil.
- 3 Step 3 - Spatial distribution of the attenuation factor pesticide in the soil.

Figure S3



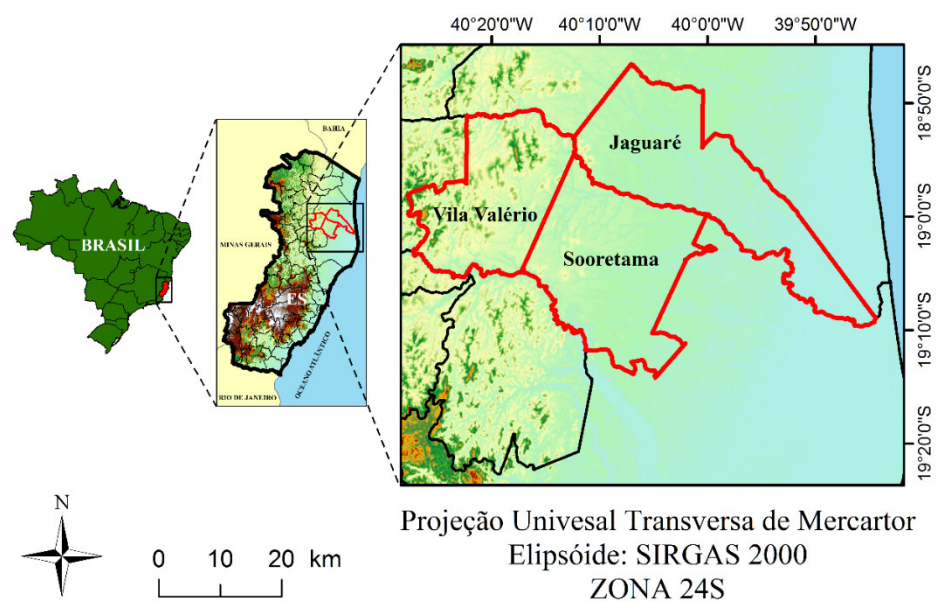

Figure S4

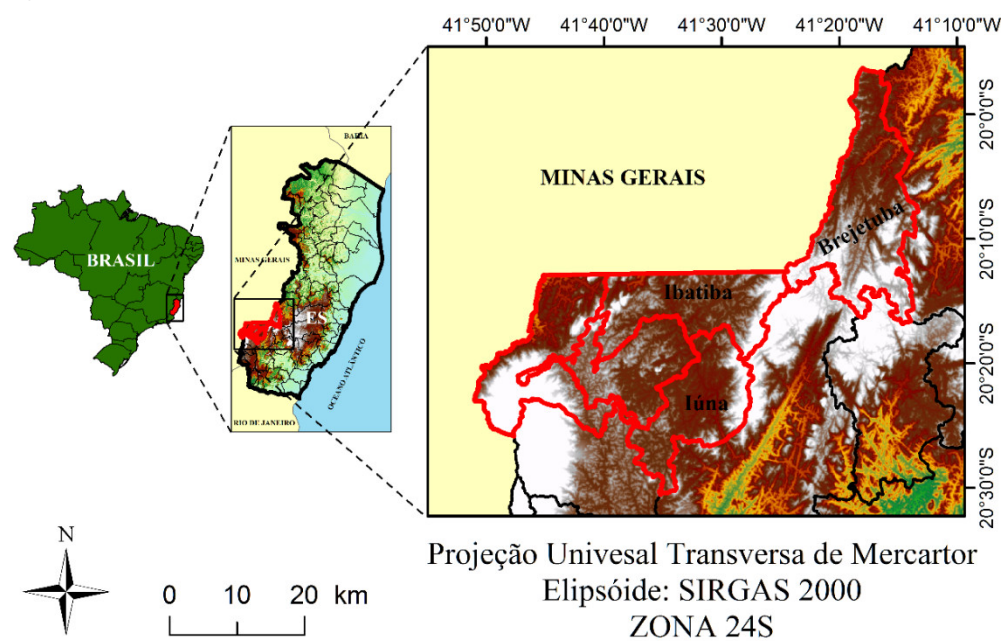

Figure S5

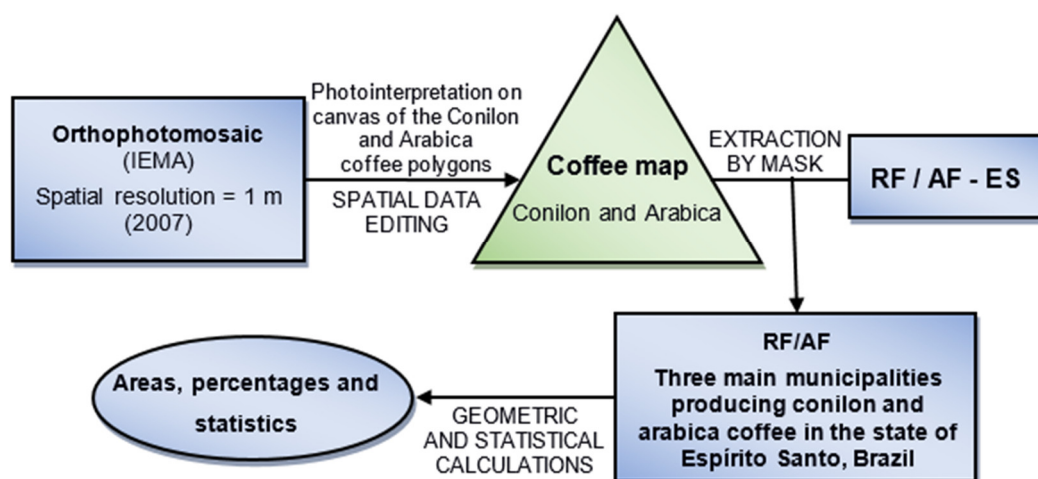

Figure S6

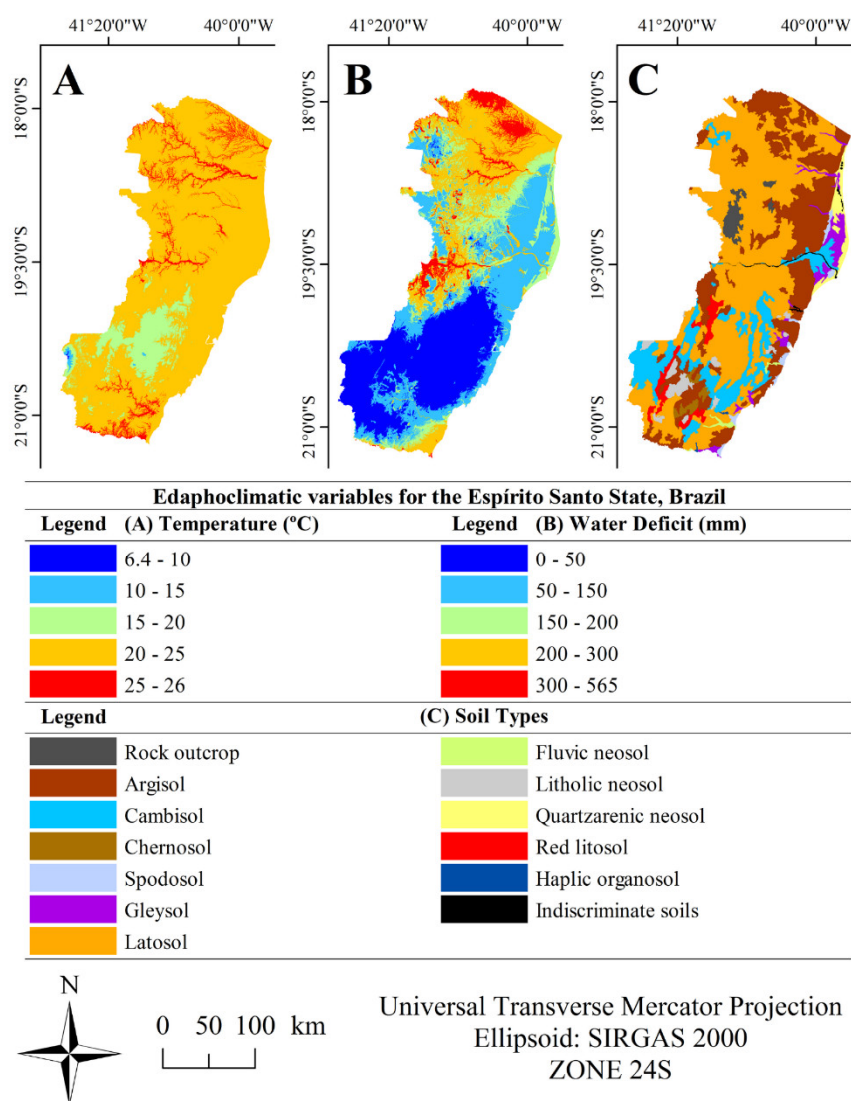

Figure S7

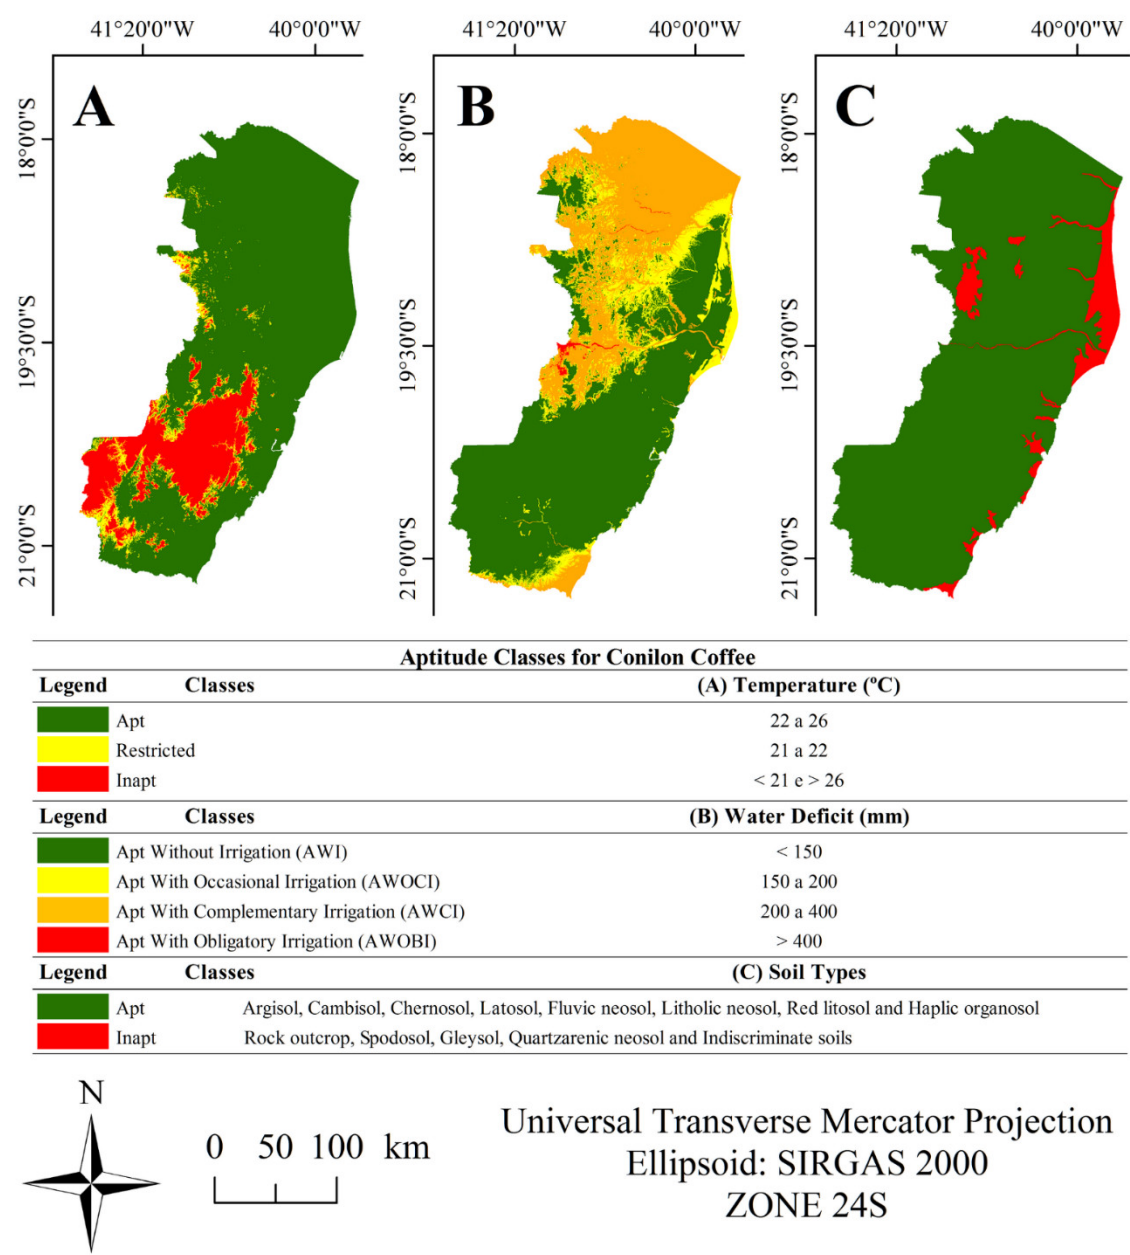

Figure S8

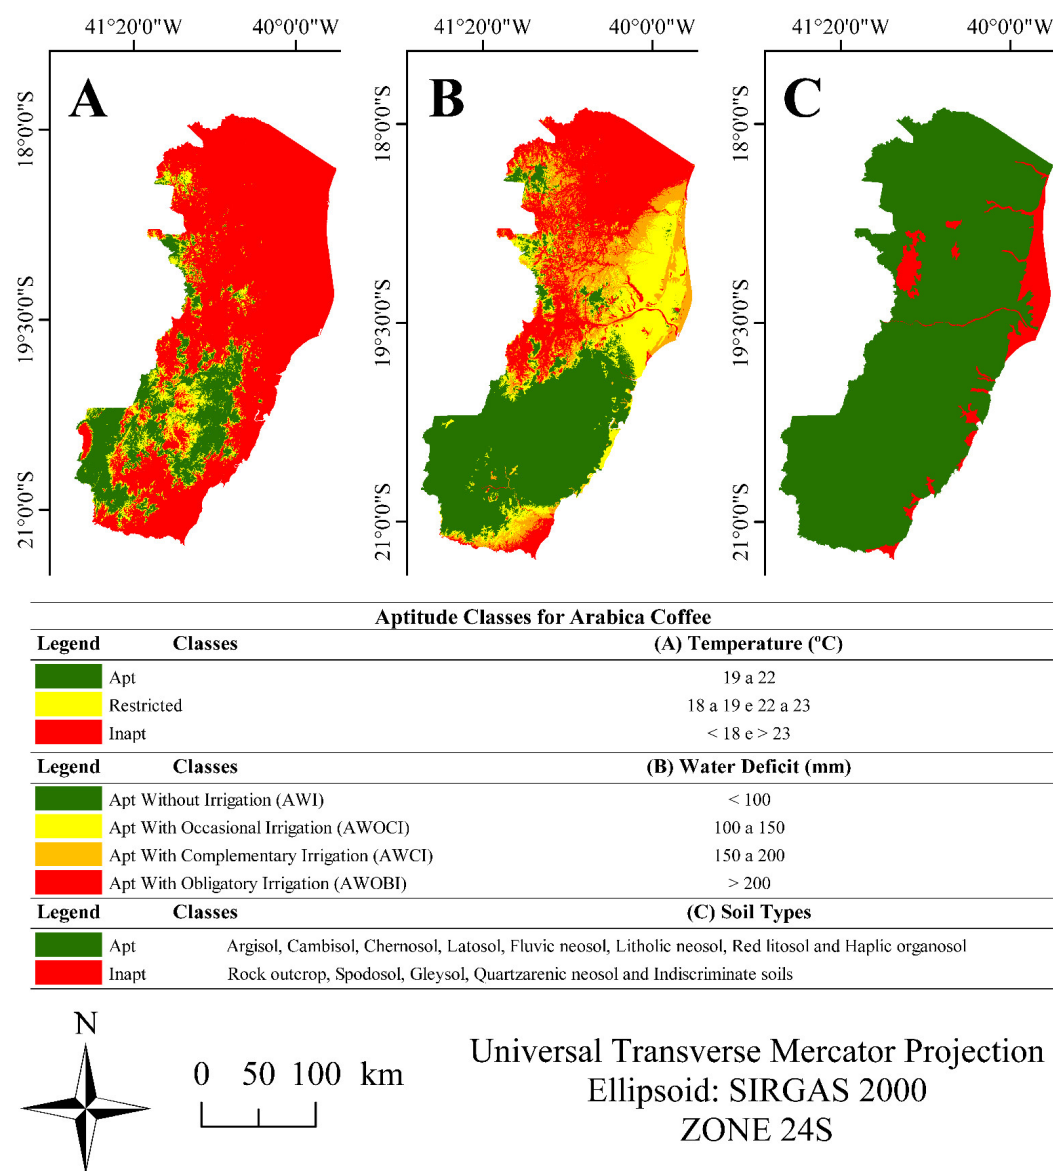

Figure S9



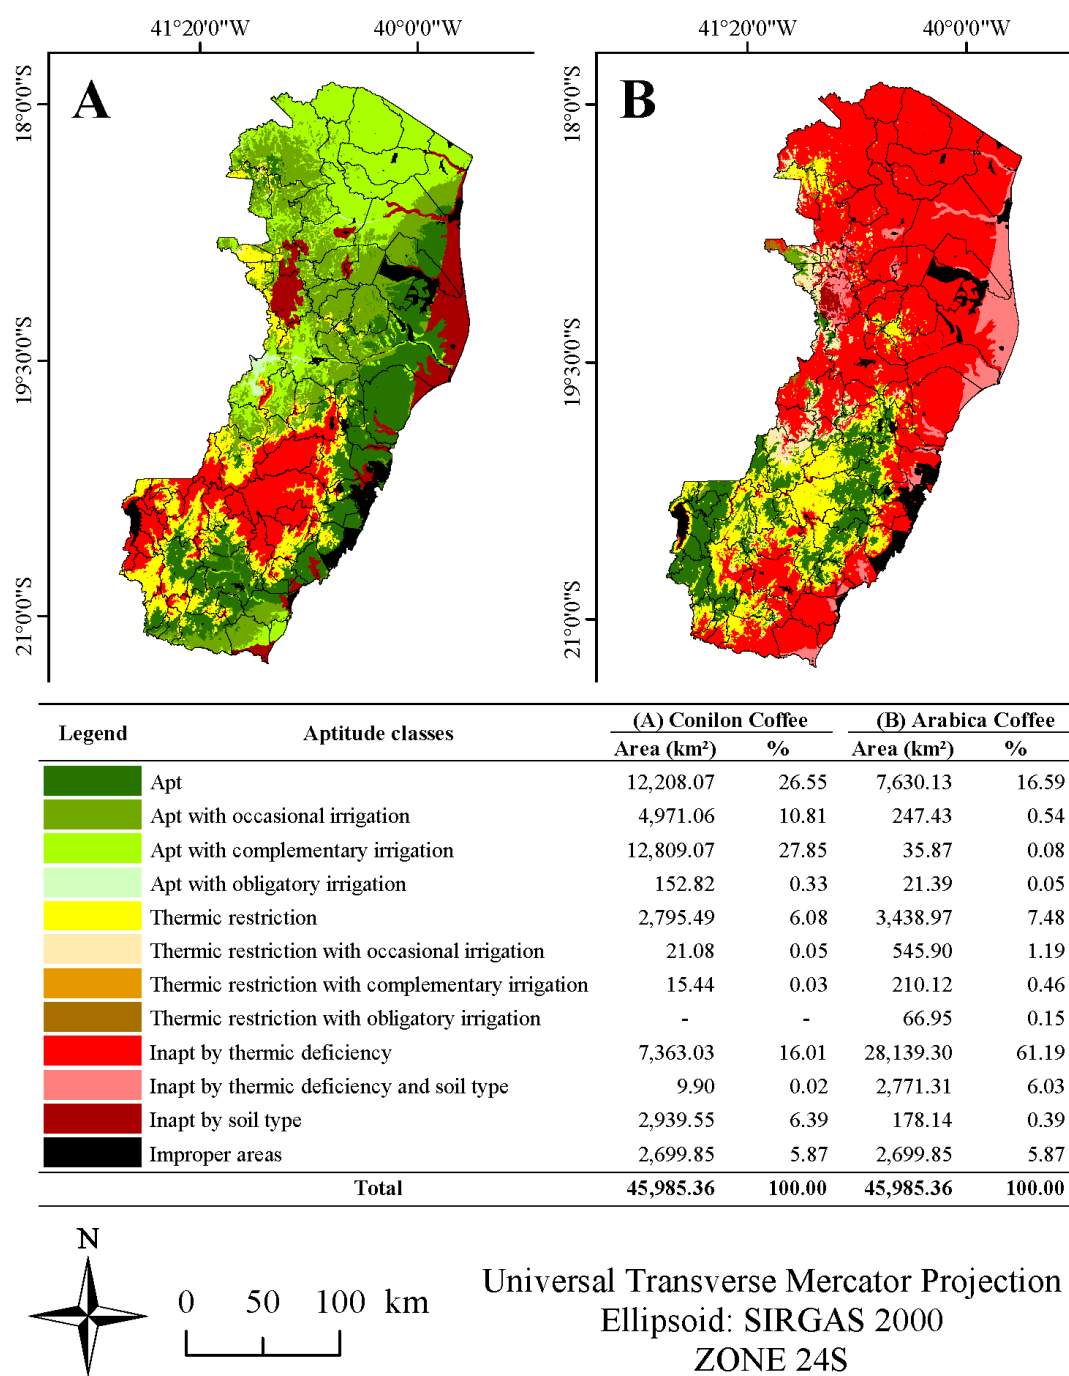

Figure S10

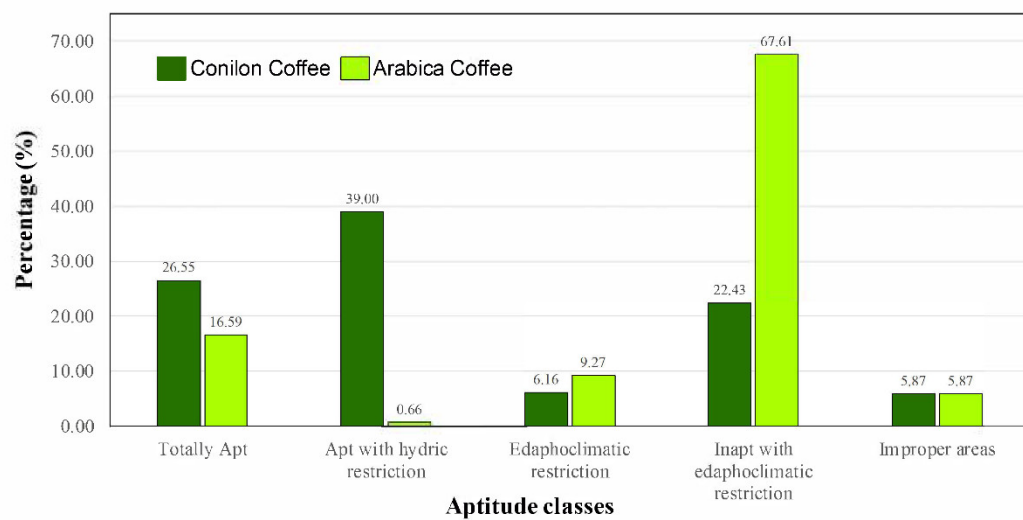

Figure S11

## Conilon Coffee

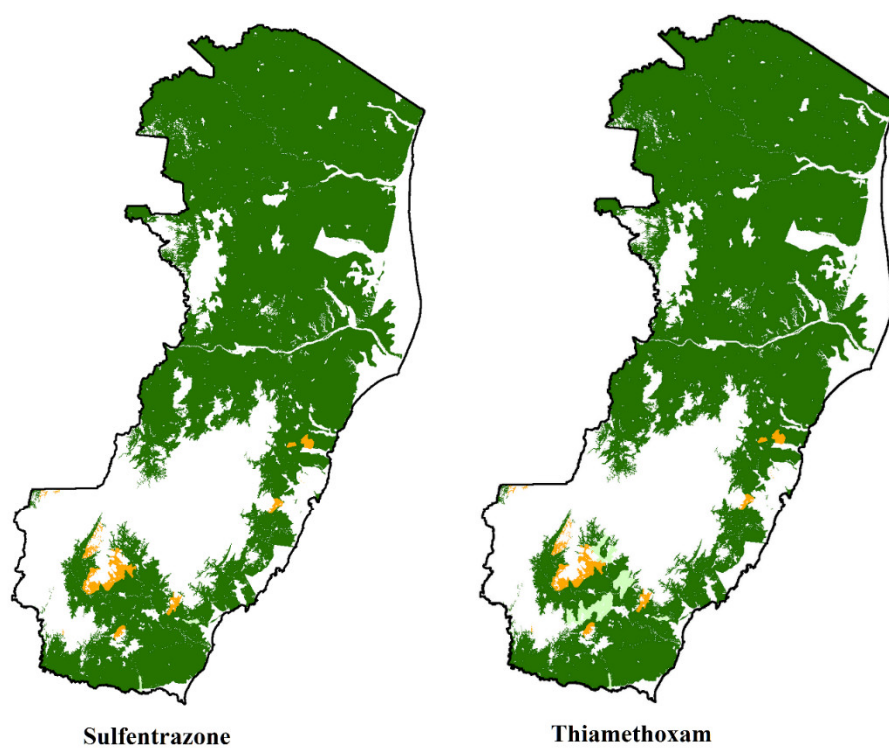

| Pesticides    | Retardation Factor (RF) |   |                  |      |                      |   |                    |       | Total (km²) |                     |           |
|---------------|-------------------------|---|------------------|------|----------------------|---|--------------------|-------|-------------|---------------------|-----------|
|               | Very low<br>1           |   | Low<br>1.0 a 2.0 |      | Meddium<br>2.0 a 3.0 |   | High<br>3.0 a 10.0 |       |             | Very high<br>> 10.0 |           |
|               | Area (km²)              | % | Area (km²)       | %    | Area (km²)           | % | Area (km²)         | %     |             | Area (km²)          | %         |
| Sulfentrazone | -                       | - | 406.22           | 1.35 | -                    | - | 29,703.58          | 98.55 | 29.70       | 0.10                | 30,139.49 |
| Thiamethoxam  | -                       | - | 406.22           | 1.35 | -                    | - | 29,330.57          | 97.32 | 402.71      | 1.34                |           |

N



0

100

200

km



Universal Transverse Mercator Projection

Ellipsoid: SIRGAS 2000

ZONE 24S

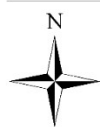

0 100 200 km

Universal Transverse Mercator Projection  
Ellipsoid: SIRGAS 2000  
ZONE 24S

Figure S12

### Arabica Coffee

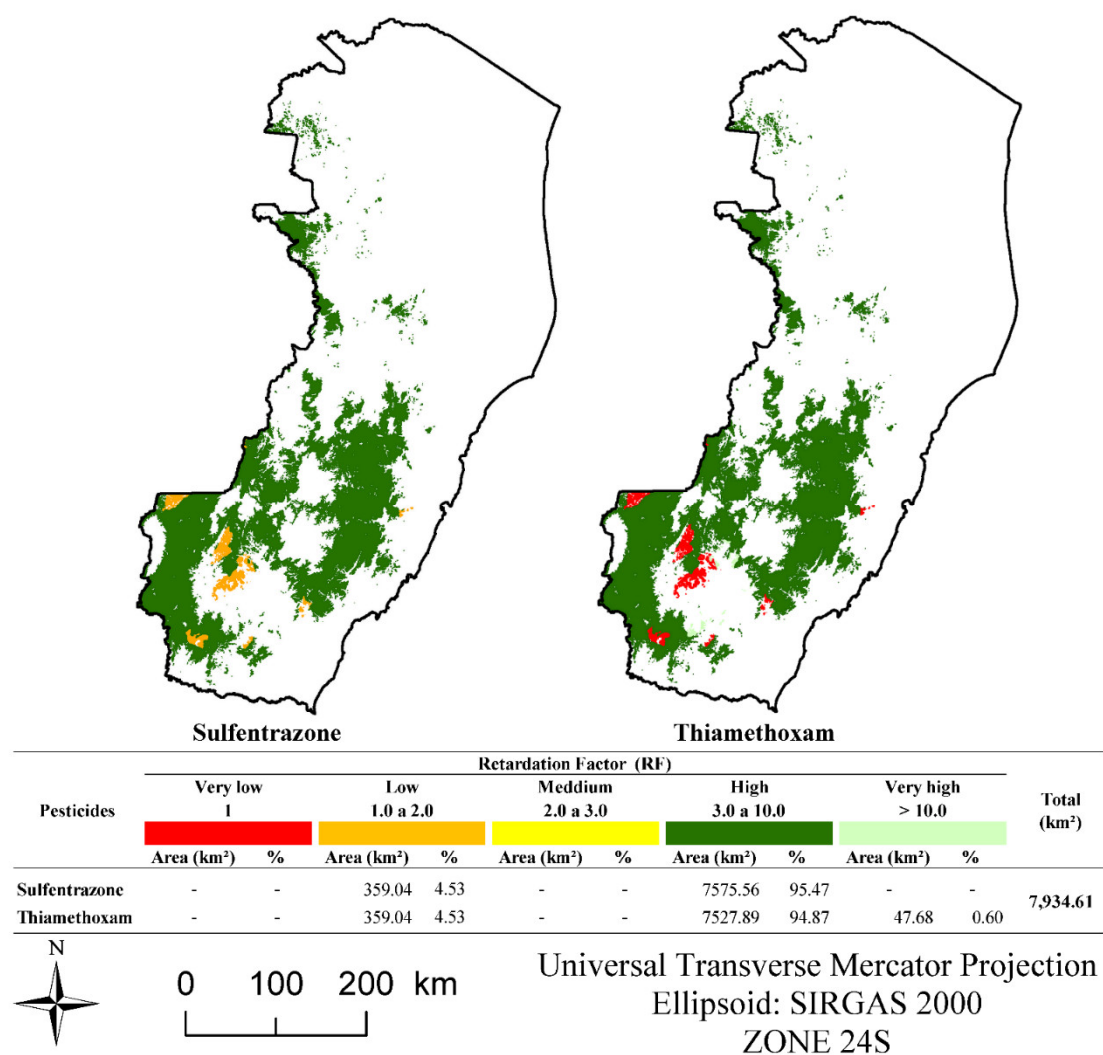

Figure S13

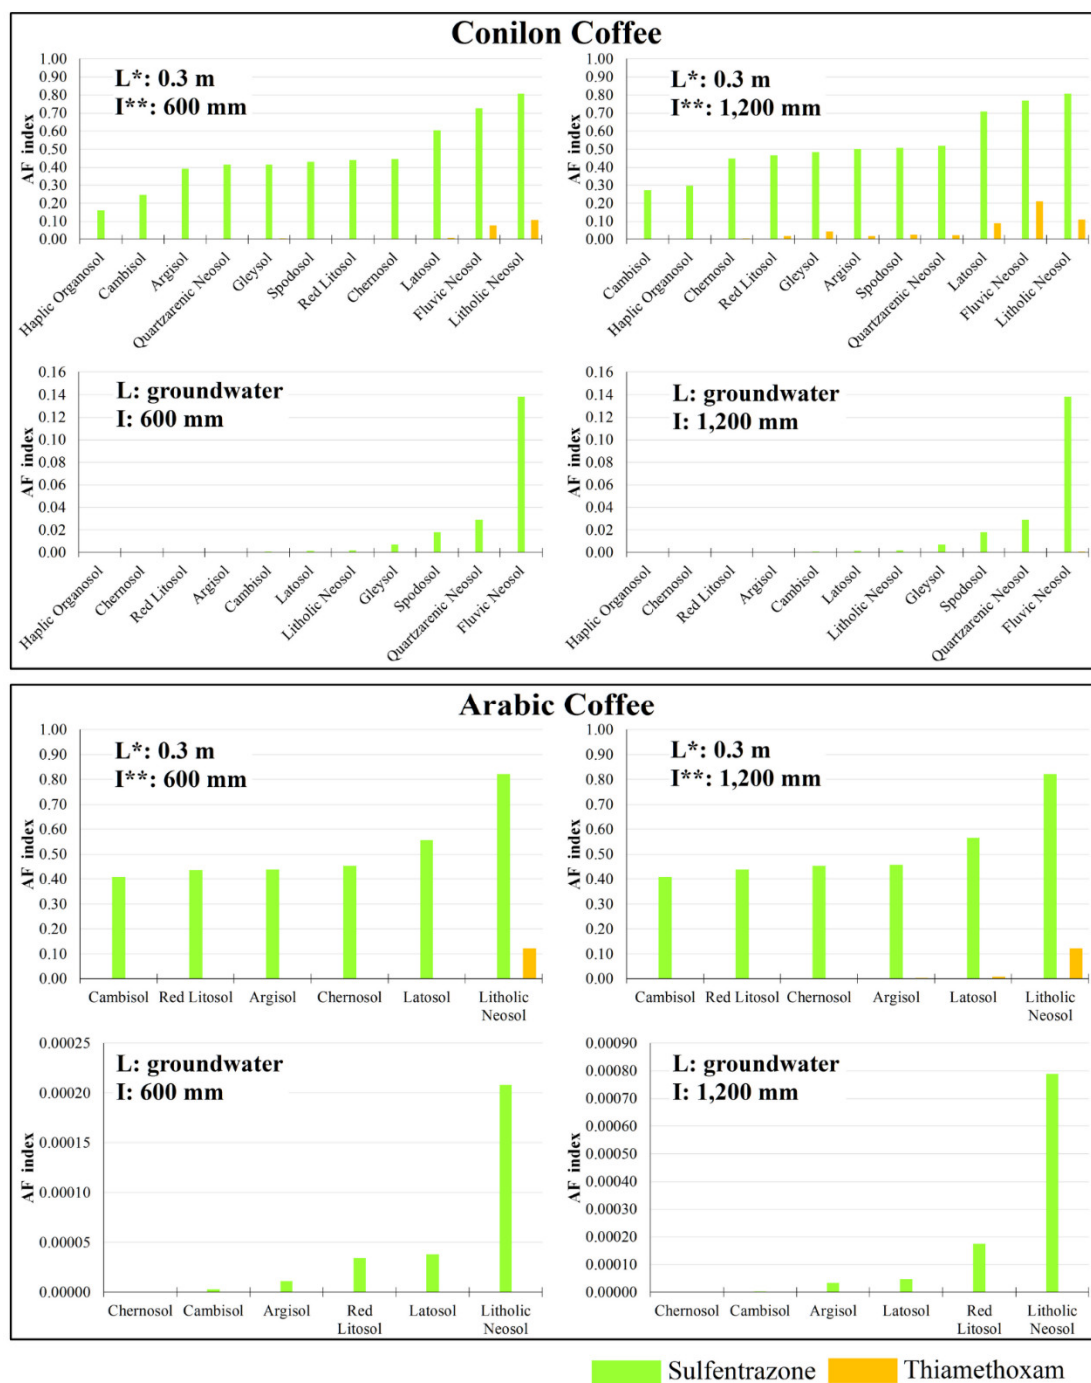

Figure S14

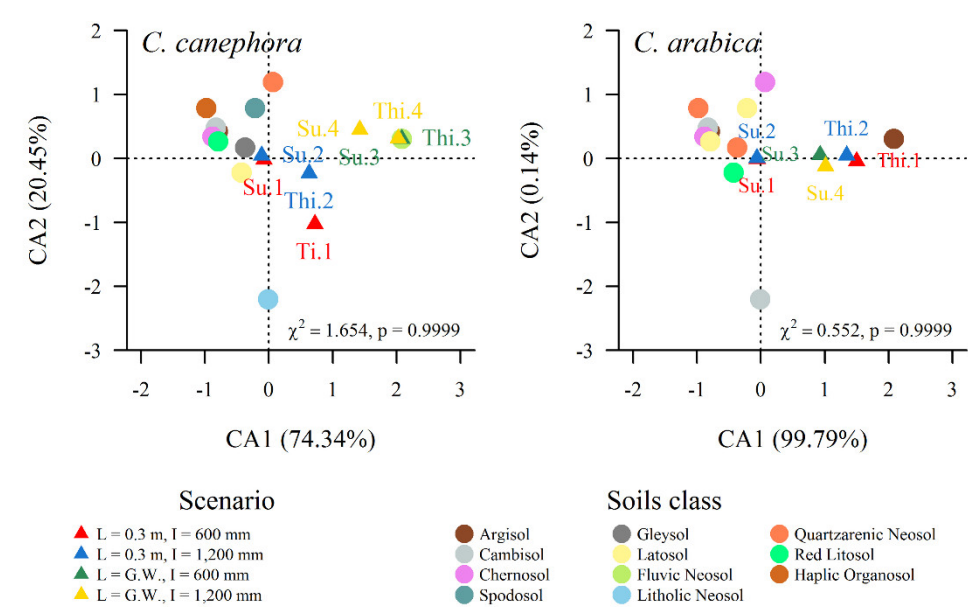

Figure S15



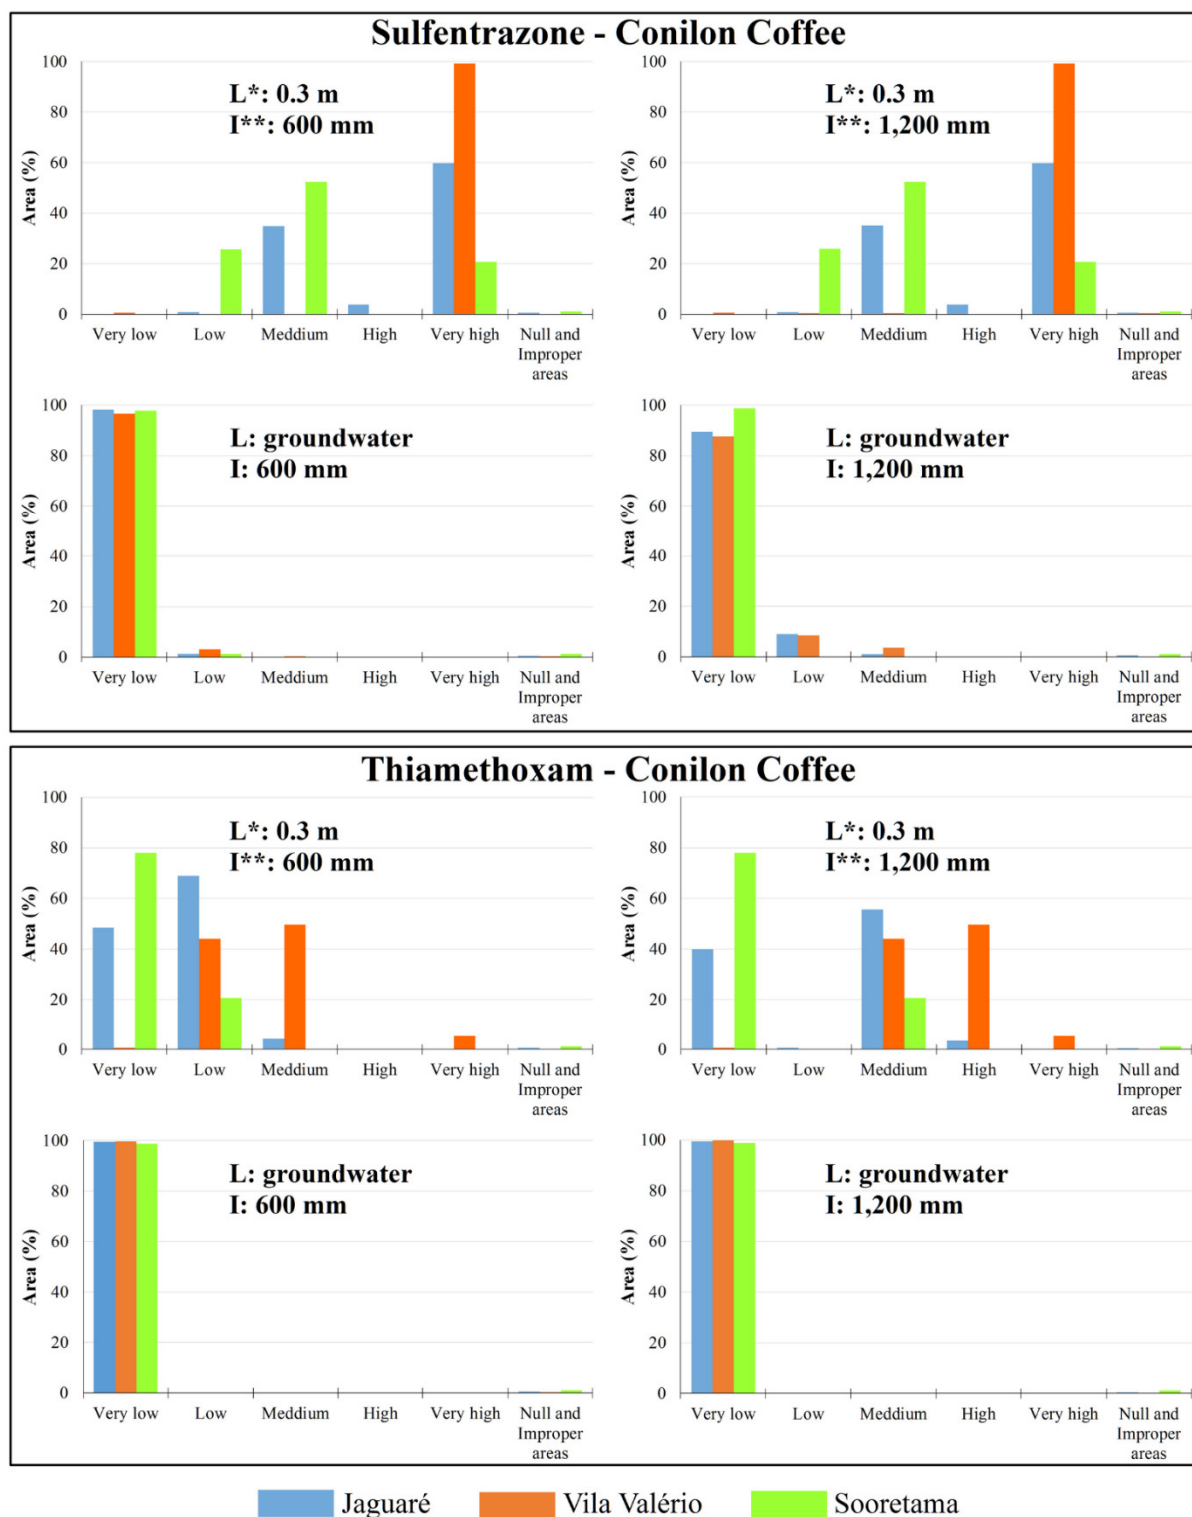

Figure S16

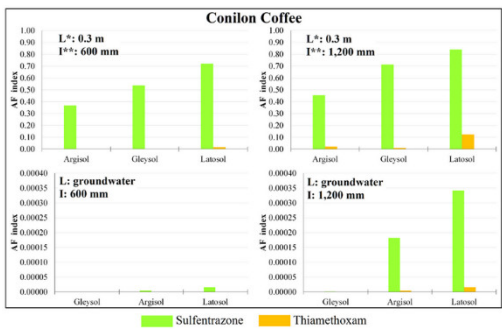

Figure S17

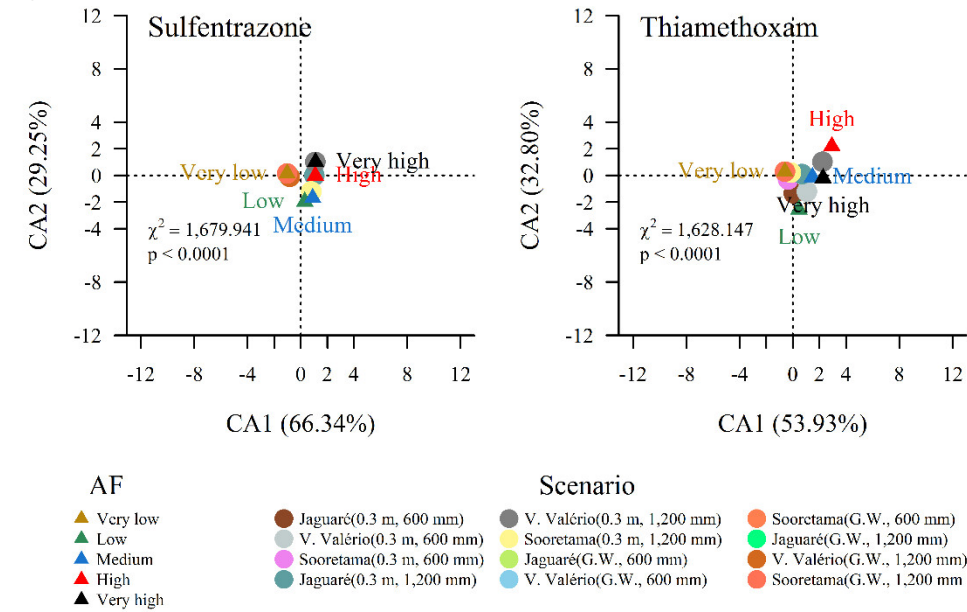

Figure S18

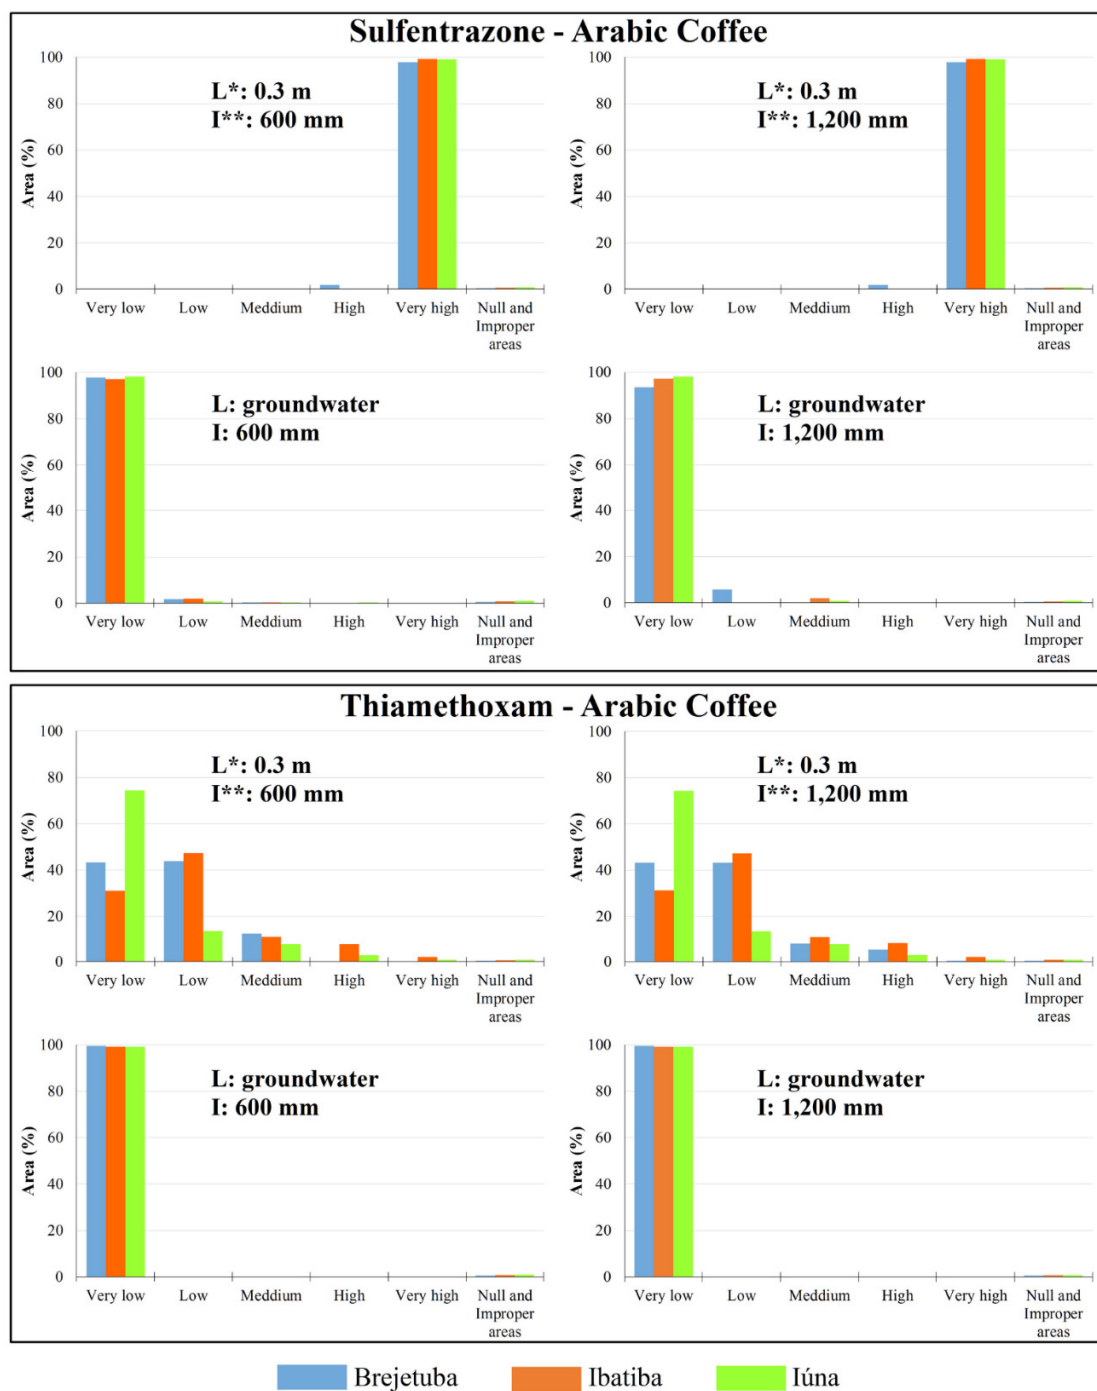

Figure S19

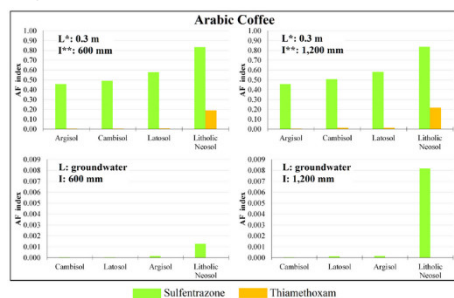

Figure S20

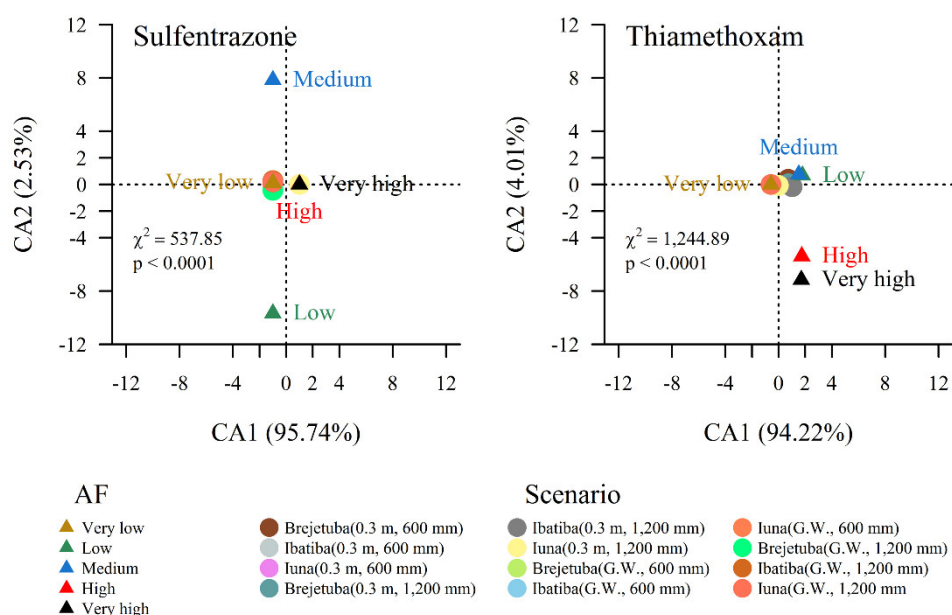

Figure S21.

## Supplementary Material References

1. Silva, V.P.R.; Oliveira, S.D.; Santos, C.A.C.; Silva, M.T. Risco climático da cana-de-açúcar cultivada na região nordeste do Brasil. *Rev. Bras. Eng. Agrícola e Ambient.* **2013**, *17*, 180–189. <https://doi.org/10.1590/S1415-43662013000200009>.
2. Portugal, A.F.; Costa, O.D.V.; Costa, L.M.; Santos, B.C.M. Atributos químicos e físicos de um cambissolo háptico Tb distrófico sob diferentes usos na Zona da Mata mineira. *Rev. Bras.* **2008**, *32*, 249–258.
3. Alvez, I.M.; Ferreira, L.S.; Ferreira, E.A.; Maia, J.C.S.; Dallacort, R. *Determinação da densidade relativa do solo sob sistema de pastejo*; Campo Grande, MS, Brazil, 2014.
4. Bonumá, N.B.; Rodrigues, M.F.; Barros, C.A.P.; Dalbianco, L.; Reichert, J.M.; Minella, J.P.G. Determinação de propriedades físicas do solo com base para a modelagem da dinâmica da água no solo. In *Proceedings of the VII Reunião Sul Brasileira de Ciência do Solo*; UFSM: Santa Maria, RS, Brazil, 2010; p. 6.
5. Ribeiro Filho, M.R.; Araújo Filho, J.C.; Ribeiro, M.R.; Jacomine, P.K.T. *Guia de excursão pedológica do XXX Congresso Brasileiro de Ciência do Solo: Solos da Zona da Mata de Pernambuco*; Embrapa Solos: Recife, PE, Brazil, 2005; p. 85.
6. Coelho, J.B.M.; Barros, M.F.C.; Corrêa, M.M.; Wanderley, R.A.; Coelho Junior, J.M.; Figueredo, J.L.C. Efeito do polímero hidratassolo sobre propriedades físico-hídricas de três solos. *Rev. Bras. Ciências Agrárias-Brazilian. J. Agric. Sci.* **2008**, *3*, 253–259. <https://doi.org/10.5039/agraria.v3i3a238>.
7. Parahyba, R.B.V. *Geoambientes, litotopossequências e características físico-hídricas de solos arenosos da bacia do Tucano, Bahia, Tese de Doutorado (Programa de Pós Graduação em Geografia)*; Universidade Federal de Pernambuco: Recife, PE, Brazil, 2013.
8. Scheer, M.B.; Curcio, G.R.; Roderjan, C.V. Funcionalidades ambientais de solos altomontanos na Serra da Igreja. *Paraná. Rev. Bras. Cienc. do Solo* **2011**, *35*, 1113–1126. <https://doi.org/10.1590/S0100-06832011000400005>.
9. Khan, M.A.; Liang, T. Mapping pesticide contamination potential. *Environ. Manag.* **1989**, *13*, 233–242. <https://doi.org/10.1007/BF01868370>.
